# Supplementary material
Source: PubMed Central journal article supplement (PMC3035716)
Supplement: mmc1.pdf [file mmc1.pdf]

## Supplemental Data

### A Fast, Powerful Method for Detecting Identity by Descent

Brian L. Browning and Sharon R. Browning

## Pseudocode for fastIBD algorithm

### Notation and Conventions

We assume the phased haplotype data has  $N$  samples ( $S[1:N]$ ),  $L$  markers ( $M[1:L]$ ),  $K$  sampled haplotype pairs per individual, and  $2NK$  sampled haplotypes ( $H[1:2NK]$ ). The sample corresponding to a haplotype  $h \in H$  is denoted  $\text{sample}(h)$ . If  $a$  and  $b$  are two elements of  $S$ ,  $M$ , or  $H$ , then  $a < b$  means that the index of  $a$  is less than the index of  $b$ . We assume markers are indexed in chromosomal order and that samples and haplotypes have consistent ordering so that for  $h, g \in H$ ,  $h \leq g$  if and only if  $\text{sample}(h) \leq \text{sample}(g)$ . All iterations over collections are in increasing order. For haplotypes  $h, g \in H$ , and markers  $a, b \in M$  with  $a < b$ ,  $h(a, b) == g(a, b)$  means that  $h$  and  $g$  have identical model states when restricted to the marker window starting at marker  $a$  (inclusive) and ending at marker  $b$  (exclusive).

**B[1:R]** is a subsequence of distinct markers with  $B[1] == M[1]$ ,  $B[R] == M[L]$ , and having approximately equal genetic distance between all adjacent markers in the subsequence.

**Map** is an associative map whose keys are ordered pairs of samples  $(s, t)$  satisfying  $s < t$ , and whose values are sorted Lists of shared haplotype tracts for the sample pair, sorted in order of starting marker index. Shared haplotype tracts are defined in the Methods section of the main text.

**Threshold** is the threshold for printing shared haplotype tracts. Tracts with score less than the threshold are printed.

For simplicity, the pseudocode presents the basic fastIBD algorithm. There are two additional optimizations that BEAGLE employs to decrease computation time:

1. A hash map is used to eliminate the iteration over all pairs of haplotypes in the ADD-TRACTS algorithm. This optimization is nicely described in Gusev et al. (Genome Res 2009;19(2):318-26).
2. Iteration over all pairs of samples in EXTEND-OR-REMOVE-TRACTS is replaced with iteration over the keys of Map which are mapped to a non-empty sorted tract list.

## fastIBD Pseudocode

### Algorithm: fastIBD

```
ADD-TRACTS (Map, B[1], B[2])
FOR (j=2, 3, ..., R-1) DO
  ADD-TRACTS (Map, B[j], B[j+1])
  EXTEND-OR-REMOVE-TRACTS (Map, B[j], Threshold)
EXTEND-OR-REMOVE-TRACTS (Map, B[R], Threshold)
```

### Algorithm: ADD-TRACTS(Map, Start, End)

```
FOR h ∈ H DO
  For g ∈ H WITH sample(g) > sample(h) DO
    IF (h(Start, End) == g(Start, End)) THEN
      a = min {m ∈ M : h(m, Start) == g(m, Start)}
      b = max {m ∈ M : Score(h, g, a, m) ≤ 1} //Score() is defined in Methods
      c = arg maxa ≤ m ≤ b {Score(h, g, a, m)}
      x = Score(h, g, a, c)
      Tract = NEW Tract (H1=h, H2=g, start=a, end=c, score=x)
      SortedTractList = Map.get(sample(h), sample(g))
      SortedTractList.add(Tract)
```

### Algorithm: EXTEND-OR-REMOVE-TRACTS(Map, Boundary, Threshold)

```
FOR s ∈ S DO
  FOR t ∈ S WITH t > s DO
    SortedTractList = Map.get(s, t)
    EXTEND-TO-BOUNDARY (SortedTractList, Boundary)
    MERGE-TO-BOUNDARY (SortedTractList, Boundary)
    FOR Tract ∈ SortedTractList WITH Tract.End < Boundary DO
      SortedTractList.remove(Tract) // Tract could not be extended
      IF (Tract.score < threshold) THEN
        PRINT Tract
```

### Algorithm: EXTEND-TO-BOUNDARY(SortedTractList, Boundary)

```
IF (SortedTractList.size()==0) THEN
  RETURN
MERGE-COVERED-TRACTS(SortedTractList)
// Next, recover Map Key (ordered sample pair) mapped to SortedTractList
Sample1 = sample(SortedTractList[1].H1)
Sample2 = sample(SortedTractList[1].H2)
Gap = FIRST-GAP(SortedTractList)
WHILE (Gap < Boundary) DO
  PreviousGap = Gap
  Extension = NULL
  MaxExtensionScore = -1.0
  FOR h ∈ H WITH sample(h)==Sample1 DO
    FOR g ∈ H WITH sample(g)==Sample2 DO
      b = max {m ∈ M : m ≥ Gap AND h(Gap, m)==g(Gap, m)}
      x = Score(h, g, Gap, b) // Score() is defined in Methods
      IF (b > Gap AND x > MaxExtensionScore) THEN
        MaxExtensionScore = x
        Extension = NEW Tract(H1=h, H2=g, start=Gap, end=b, score=x)
  IF (EXTENSION ≠ NULL) THEN
    SortedTractList.add(Extension)
  Gap = FIRST-GAP(SortedTractList)
  If (Gap == PreviousGap) THEN
    Gap = Boundary
```

### Algorithm: FIRST-GAP(SortedTractList)

```
IF (SortedTractList.size()==0) THEN
  Return M[L]
End = SortedTractList[1].end
For Tract ∈ SortedTractList DO
  IF (Tract.Start ≤ End) THEN
    IF (Tract.End > End) THEN
      End = Tract.End
RETURN End
```

### Algorithm: MERGE-TO-BOUNDARY(SortedTractList, Boundary)

```
MERGE-COVERED-TRACTS (SortedTractList)
TractA = NULL
IF (SortedTractList.size() ≥ 2) THEN
    TractA = SortedTractList[1]
WHILE (TractA ≠ NULL AND TractA.end < Boundary) DO
    startingSize = SortedTractList.size()
    TractB = NULL
    FOR T ∈ SortedTractList WITH (T ≠ TractA AND T.Start ≤ TractA.end) DO
        Score1 = Score(T.H1, T.H2, TractA.End, T.end)
        Score2 = TractA.Score/Score(TractA.H1, TractA.H2, T.Start, TractA.end)
        LeftScore = TractA.score × MIN {1, (100 × Score1)}
        RightScore = MIN {1, (100 × Score2)} × T.score
        X = MIN {LeftScore, RightScore}
        IF (TractB == NULL OR X < TractB.score) THEN
            TractB = NEW Tract (H1=T.H1, H2=T.H2, start=TractA.start, end=T.end, score=X)
    TractA = NULL
IF (TractB ≠ NULL) THEN
    SortedList.add(TractB)
MERGE-COVERED-TRACTS (SortedTractList)
IF (SortedTractList.size() ≥ 2) THEN
    TractA = SortedTractList[1]
```

### Algorithm: MERGE-COVERED-TRACTS(SortedTractList)

```
FOR Tract1 ∈ SortedTractList DO
    FOR Tract2 ∈ SortedTractList WITH Tract2 ≠ Tract1 DO
        IF (Tract1.start ≤ Tract2.start) THEN
            IF (Tract2.end ≤ Tract1.end) THEN
                IF (Tract2.score < Tract1.score) THEN
                    Tract1.score = Tract2.score
                    SortedTractList.remove(Tract2)
```
